# Supplementary material
Source: HighWire-hosted journal article supplement (https://bmjpaedsopen.bmj.com/content/6/1/e001225)
Supplement: inline-supplementary-material-1 [file inline-supplementary-material-1.xlsx]

## Sheet: Figure 1a
#	DATE	SO2_POX_0100	SO2_POX_0200	SO2_POX_0300	SO2_POX_0400	SO2_POX_0500	SO2_POX_0600	SO2_POX_0700	SO2_POX_0800	SO2_POX_0900	SO2_POX_1000
1	2019-01-08	NA		6	5	21	40	30	32	39	35
2	2019-01-14	NA					73	85	93	96	94
3	2019-01-18	NA		27	28	28	11	26	37	40	46
4	2019-01-25	NA			66	95	95	96	95	97	97
5	2019-01-28	NA				75		70	54	95	92
6	2019-02-08	NA					71	74	74	74	72
7	2019-02-08	NA			24	28	39	75
8	2019-02-12	NA	13	6	18	29	26	24	44	61	75
9	2019-02-12	NA		40	23	30	34	35	42	61	64
10	2019-02-16	NA	75	81	84	87	85	86	93	97	96
11	2019-02-20	NA	46	59	66	98	100	100	100	100
12	2019-02-21	NA	28	69	28	59	29	43	75	40	80
13	2019-02-22	NA	36	43				89	69	93	88
14	2019-02-24	NA		83	73	50	69	78	71	85	90
15	2019-02-24	NA		67	88	81	81	83	78	88	87
16	2019-02-25	NA		6	75	94	96	98	98	97	98
17	2019-03-05	NA		30	66		56		79	82	83
18	2019-03-06	NA			47	57	72	70	83	84	90
19	2019-03-07	NA			88	93	97	98	99	97	97
20	2019-03-12	NA		15	39	59	62	70	91	92	94
21	2019-03-13	NA	42	53	82	100	100	97	98	99	99
22	2019-03-13	NA					84	94
23	2019-03-19	NA		86	64	97	93	98	95	96	93
24	2019-03-20	NA	57	61	70	67	96	100	100	100	100
25	2019-03-20	NA				22	38		97	99	97
26	2019-03-21	NA		61	60	63	61	69	66	81	80
27	2019-03-21	NA	54	79	86	82	89	96	99	100	97
28	2019-03-22	NA			34				47	58	57
29	2019-03-25	NA		91	96	92	96	97	96	95	94
30	2019-03-25	NA					84		66	89	84
31	2019-03-29	NA		63	13	54	28	61	97	99	87
32	2019-04-01	NA	23	42	58	81	98		100	100	100
33	2019-04-02	NA								93	100
34	2019-04-04	NA				49	46	34	33	24	30
35	2019-04-12	NA			67	83	84	87	91	89	90
36	2019-04-12	NA					77	83	87	88	89
37	2019-04-18	NA			77	70	83	87	88	92	94
38	2019-05-30	NA	0	1	5	76	92	97	100	92	98
39	2019-06-12	NA				35	43	38	24	40	39
40	2019-07-12	NA				67	87	92	94		98
41	2019-07-16	NA		33			96	98
42	2019-07-16	NA	53	51	61	96	100	100	98	100	100
43	2019-07-16	NA		67	85	88	92	97	97	96	96
44	2019-07-17	NA		49	65	83	93	94	92		97
45	2019-07-17	NA		47	34	49	61	85	93	95	97
46	2019-07-19	NA		68	87	93	98	99	99	98	99
47	2019-07-19	NA			31	44	54		8	69	71
48	2019-07-22	NA		46	67	54	70	61	70	53	63
49	2019-07-31	NA			30	54	65	70

## Sheet: Figure 1b
#	DATE	SP_BR_0100	SO2_POX_0100	SP_BR_0200	SO2_POX_0200	SP_BR_0300	SO2_POX_0300	SP_BR_0400	SO2_POX_0400	SP_BR_0500	SO2_POX_0500	SP_BR_0600	SO2_POX_0600	SP_BR_0700	SO2_POX_0700	SP_BR_0800	SO2_POX_0800	SP_BR_0900	SO2_POX_0900	SP_BR_1000	SO2_POX_1000
1	2019-01-08	0	NA	0		0	6	0	5	0	21	0	40	0	30	0	32	0	39	0	35
2	2019-01-14	0	NA	0		0		0		0		0	73	1		1		1		1
3	2019-01-18	0	NA	0		0	27	0	28	1		1		1		1		1		1
4	2019-01-25	0	NA	0		0		1		1		1		1		1		1		1
5	2019-01-28	0	NA	0		1		1		1		1		1		1		1		1
6	2019-02-08	0	NA	0		0		0		0		0	71	0	74	0	74	0	74	0	72
7	2019-02-08	0	NA	0		0		0	24	0	28	0	39	0	75	0		0		0
8	2019-02-12	0	NA	0	13	0	6	0	18	1		1		1		1		1		1
9	2019-02-12	0	NA	0		0	40	0	23	0	30	0	34	0	35	0	42	0	61	0	64
10	2019-02-16	0	NA	0	75	0	81	0	84	1		1		1		1		1		1
11	2019-02-20	0	NA	0	46	1		1		1		1		1		1		1		1
12	2019-02-21	0	NA	0	28	0	69	0	28	0	59	0	29	0	43	0	75	0	40	0	80
13	2019-02-22	0	NA	0	36	0	43	0		0		0		0	89	0	69	0	93	0	88
14	2019-02-24	0	NA	0		0	83	0	73	0	50	0	69	0	78	0	71	0	85	1
15	2019-02-24	0	NA	0		0	67	1		1		1		1		1		1		1
16	2019-02-25	0	NA	0		0	6	0	75	1		1		1		1		1		1
17	2019-03-05	0	NA	0		0	30	0	66	1		1		1		1		1		1
18	2019-03-06	0	NA	0		0		0	47	1		1		1		1		1		1
19	2019-03-07	0	NA	0		0		1		1		1		1		1		1		1
20	2019-03-12	0	NA	0		0	15	0	39	0	59	1		1		1		1		1
21	2019-03-13	0	NA	0	42	0	53	1		1		1		1		1		1		1
22	2019-03-13	0	NA	0		0		0		0		0	84	0	94	1		1		1
23	2019-03-19	0	NA	0		0	86	1		1		1		1		1		1		1
24	2019-03-20	0	NA	0	57	0	61	1		1		1		1		1		1		1
25	2019-03-20	0	NA	0		0		0		0	22	1		1		1		1		1
26	2019-03-21	0	NA	0		0	61	0	60	0	63	0	61	1		1		1		1
27	2019-03-21	0	NA	0	54	0	79	1		1		1		1		1		1		1
28	2019-03-22	0	NA	0		0		0	34	0		0		0		0	47	0	58	0	57
29	2019-03-25	0	NA	0		0	91	0	96	0	92	0	96	0	97	0	96	0	95	0	94
30	2019-03-25	0	NA	0		0		0		0		0	84	0		0	66	0	89	0	84
31	2019-03-29	0	NA	0		0	63	0	13	0	54	0	28	1		1		1		1
32	2019-04-01	0	NA	0	23	1		1		1		1		1		1		1		1
33	2019-04-02	0	NA	0		0		0		0		0		0		0		0	93	0	100
34	2019-04-04	0	NA	NA		0		0		0	49	0	46	0	34	0	33	0	24	0	30
35	2019-04-12	0	NA	0		0		0	67	0	83	0	84	0	87	1		1		1
36	2019-04-12	0	NA	0		0		0		0		0	77	0	83	0	87	0	88	0	89
37	2019-04-18	0	NA	0		0		0	77	1		1		1		1		1		1
38	2019-05-30	0	NA	0	0	0	1	0	5	0	76	0	92	0	97	0	100	0	92	0	98
39	2019-06-12	0	NA	0		0		0		0	35	0	43	0	38	0	24	0	40	0	39
40	2019-07-12	0	NA	0		0		0		1		1		1		1		1		1
41	2019-07-16	0	NA	0		0	33	1		1		1		1		1		1		1
42	2019-07-16	0	NA	0	53	0	51	1		1		1		1		1		1		1
43	2019-07-16	0	NA	0		0	67	0	85	0	88	1		1		1		1		1
44	2019-07-17	0	NA	0		1		1		1		1		1		1		1		1
45	2019-07-17	0	NA	0		0	47	0	34	0	49	1		1		1		1		1
46	2019-07-19	0	NA	0		1		1		1		1		1		1		1		1
47	2019-07-19	0	NA	0		0		0	31	0	44	0	54	0		0	8	0	69	0	71
48	2019-07-22	0	NA	0		0	46	0	67	0	54	0	70	0	61	0	70	0	53	0	63
49	2019-07-31	0	NA	0		0		1		1		1		1		1		1		1

## Sheet: Figure 2a
#	DATE	HR_0100	HR_0200	HR_0300	HR_0400	HR_0500	HR_0600	HR_0700	HR_0800	HR_0900	HR_1000
1	2019-01-08		70	62	64	63	61	61	103	127	131
2	2019-01-14			80			162	162	172	171	172
3	2019-01-18	127		151	142	153	148	159	146	151	157
4	2019-01-25		79	104	182	197	198	198			194
5	2019-01-28	64	113	148		151		132	131	132	128
6	2019-02-08			32	44	103	128	136	142	142	144
7	2019-02-08				57	55	114	196	199	191
8	2019-02-12	135	84	153	149	109	71	146	144	144	143
9	2019-02-12		58	137	149	171	175	176	182	186	187
10	2019-02-16	119	169	168	172	168	174	115	168	172
11	2019-02-20		179	173	172	178	184	188	189	188
12	2019-02-21		140	159	151	156	150	159	160	153	161
13	2019-02-22		67	179			165	136	155	142	135
14	2019-02-24			182	182	170	189	192	184	185	179
15	2019-02-24	142	150	173	182	183	181	180	175	172	168
16	2019-02-25			77	163	158	170	164	161	154	154
17	2019-03-05		93	128	168	178	186		191	190	189
18	2019-03-06		180		188	188	190	192	190	189	187
19	2019-03-07		56	152	169	176	181	184	183	184	183
20	2019-03-12		72	69	171	162	193	194	200	198	199
21	2019-03-13	145	167	169	190	198	201	204	200	195	191
22	2019-03-13			147	205	205	206	213
23	2019-03-19			175	179	187	187	183	179	177	179
24	2019-03-20	128	126	154	169	175	179			187	188
25	2019-03-20				131	99	146	168	169	170	171
26	2019-03-21	120	120	169	172	167	173	180	179	173	176
27	2019-03-21		120	152	140	158	154	156	151	138	136
28	2019-03-22				63	61	59	141	151	155	166
29	2019-03-25	55	180	178	190	186	188	188	181	183	180
30	2019-03-25		65	63	63	58	106	113	142	154	159
31	2019-03-29			91	95	162	148	155	169
32	2019-04-01		108	159	169	178	161		174		170
33	2019-04-02									172	169
34	2019-04-04						176	173	170	171	176
35	2019-04-12				180	173	173	166	166	169	163
36	2019-04-12			130	151		160	159	122	162	167
37	2019-04-18				169	174	171	177	174	131	173
38	2019-05-30		65	61	185	201	210	210	192	200	201
39	2019-06-12				135	146	149	149	122	149	145
40	2019-07-12			170	164	169	167	161	162		155
41	2019-07-16		130	112			190	188
42	2019-07-16	136	163	159		193	194	192	191	187	182
43	2019-07-16			175	184	185	184	188	186	182	184
44	2019-07-17	87	141	199	199	195	192	186			183
45	2019-07-17		60	145	57	116	131	141	141	142	141
46	2019-07-19	69	147	180	184	191	194	194	195	197	187
47	2019-07-19		120	131	140	142	121	77	99	137	140
48	2019-07-22		64	47	44	52	63	61	60	91
49	2019-07-31				173	179	178	176

## Sheet: Figure 2b
#	DATE	SP_BR_0100	HR_0100	SP_BR_0200	HR_0200	SP_BR_0300	HR_0300	SP_BR_0400	HR_0400	SP_BR_0500	HR_0500	SP_BR_0600	HR_0600	SP_BR_0700	HR_0700	SP_BR_0800	HR_0800	SP_BR_0900	HR_0900	SP_BR_1000	HR_1000
1	2019-01-08	0		0	70	0	62	0	64	0	63	0	61	0	61	0	103	0	127	0	35
2	2019-01-14	0		0		0	80	0		0		0	162	1		1		1		1
3	2019-01-18	0	127	0		0	151	0	142	1		1		1		1		1		1
4	2019-01-25	0		0	79	0	104	1		1		1		1		1		1		1
5	2019-01-28	0	64	0	113	1		1		1		1		1		1		1		1
6	2019-02-08	0		0		0	32	0	44	0	103	0	128	0	136	0	142	0	142	0	72
7	2019-02-08	0		0		0		0	57	0	55	0	114	0	196	0	199	0	191	0
8	2019-02-12	0	135	0	84	0	153	0	149	1		1		1		1		1		1
9	2019-02-12	0		0	58	0	137	0	149	0	171	0	175	0	176	0	182	0	186	0	64
10	2019-02-16	0	119	0	169	0	168	0	172	1		1		1		1		1		1
11	2019-02-20	0		0	179	1		1		1		1		1		1		1		1
12	2019-02-21	0		0	140	0	159	0	151	0	156	0	150	0	159	0	160	0	153	0	80
13	2019-02-22	0		0	67	0	179	0		0		0	165	0	136	0	155	0	142	0	88
14	2019-02-24	0		0		0	182	0	182	0	170	0	189	0	192	0	184	0	185	1
15	2019-02-24	0	142	0	150	0	173	1		1		1		1		1		1		1
16	2019-02-25	0		0		0	77	0	163	1		1		1		1		1		1
17	2019-03-05	0		0	93	0	128	0	168	1		1		1		1		1		1
18	2019-03-06	0		0	180	0		0	188	1		1		1		1		1		1
19	2019-03-07	0		0	56	0	152	1		1		1		1		1		1		1
20	2019-03-12	0		0	72	0	69	0	171	0	162	1		1		1		1		1
21	2019-03-13	0	145	0	167	0	169	1		1		1		1		1		1		1
22	2019-03-13	0		0		0	147	0	205	0	205	0	206	0	213	1		1		1
23	2019-03-19	0		0		0	175	1		1		1		1		1		1		1
24	2019-03-20	0	128	0	126	0	154	1		1		1		1		1		1		1
25	2019-03-20	0		0		0		0	131	0	99	1		1		1		1		1
26	2019-03-21	0	120	0	120	0	169	0	172	0	167	0	173	1		1		1		1
27	2019-03-21	0		0	120	0	152	1		1		1		1		1		1		1
28	2019-03-22	0		0		0		0	63	0	61	0	59	0	141	0	151	0	155	0	57
29	2019-03-25	0	55	0	180	0	178	0	190	0	186	0	188	0	188	0	181	0	183	0	94
30	2019-03-25	0		0	65	0	63	0	63	0	58	0	106	0	113	0	142	0	154	0	84
31	2019-03-29	0		0		0	91	0	95	0	162	0	148	1		1		1		1
32	2019-04-01	0		0	108	1		1		1		1		1		1		1		1
33	2019-04-02	0		0		0		0		0		0		0		0		0	172	0	100
34	2019-04-04	0		NA		0		0		0		0	176	0	173	0	170	0	171	0	30
35	2019-04-12	0		0		0		0	180	0	173	0	173	0	166	1		1		1
36	2019-04-12	0		0		0	130	0	151	0		0	160	0	159	0	122	0	162	0	89
37	2019-04-18	0		0		0		0	169	1		1		1		1		1		1
38	2019-05-30	0		0	65	0	61	0	185	0	201	0	210	0	210	0	192	0	200	0	98
39	2019-06-12	0		0		0		0	135	0	146	0	149	0	149	0	122	0	149	0	39
40	2019-07-12	0		0		0	170	0	164	1		1		1		1		1		1
41	2019-07-16	0		0	130	0	112	1		1		1		1		1		1		1
42	2019-07-16	0	136	0	163	0	159	1		1		1		1		1		1		1
43	2019-07-16	0		0		0	175	0	184	0	185	1		1		1		1		1
44	2019-07-17	0	87	0	141	1		1		1		1		1		1		1		1
45	2019-07-17	0		0	60	0	145	0	57	0	116	1		1		1		1		1
46	2019-07-19	0	69	0	147	1		1		1		1		1		1		1		1
47	2019-07-19	0		0	120	0	131	0	140	0	142	0	121	0	77	0	99	0	137	0	71
48	2019-07-22	0		0	64	0	47	0	44	0	52	0	63	0	61	0	60	0	91	0	63
49	2019-07-31	0		0		0		1		1		1		1		1		1		1

## Sheet: Code Book
Abbreviation	Full name	Explanation
NA	Missing data
SO2_POX_0000	Oxygen saturation	measured with pulseoximeter mmss
HR_0000 mmss	Heart Rate	Measured with dry electrode ECG or pulse oximeter.
SP_BR_0000	Spontaneous breathing	No = 0 Yes = 1 mmss
Border		Heart rate measured by pulse oximeter
